# Supplementary material
Source: Springer Nature journal article supplement (https://www.springermedizin.de/resource/supplementary/12916_2011_480_MOESM5_ESM.pdf/9599776)

**Overall**

Sensitivity (45/50)

90.0%

**95% CI**

(77.4%, 96.3%)

Specificity (83/94)

88.3%

(79.6%, 93.7%)

**Early Stage (stage I, II)**

Sensitivity (33/38)

86.8%

(71.1%, 95.1%)

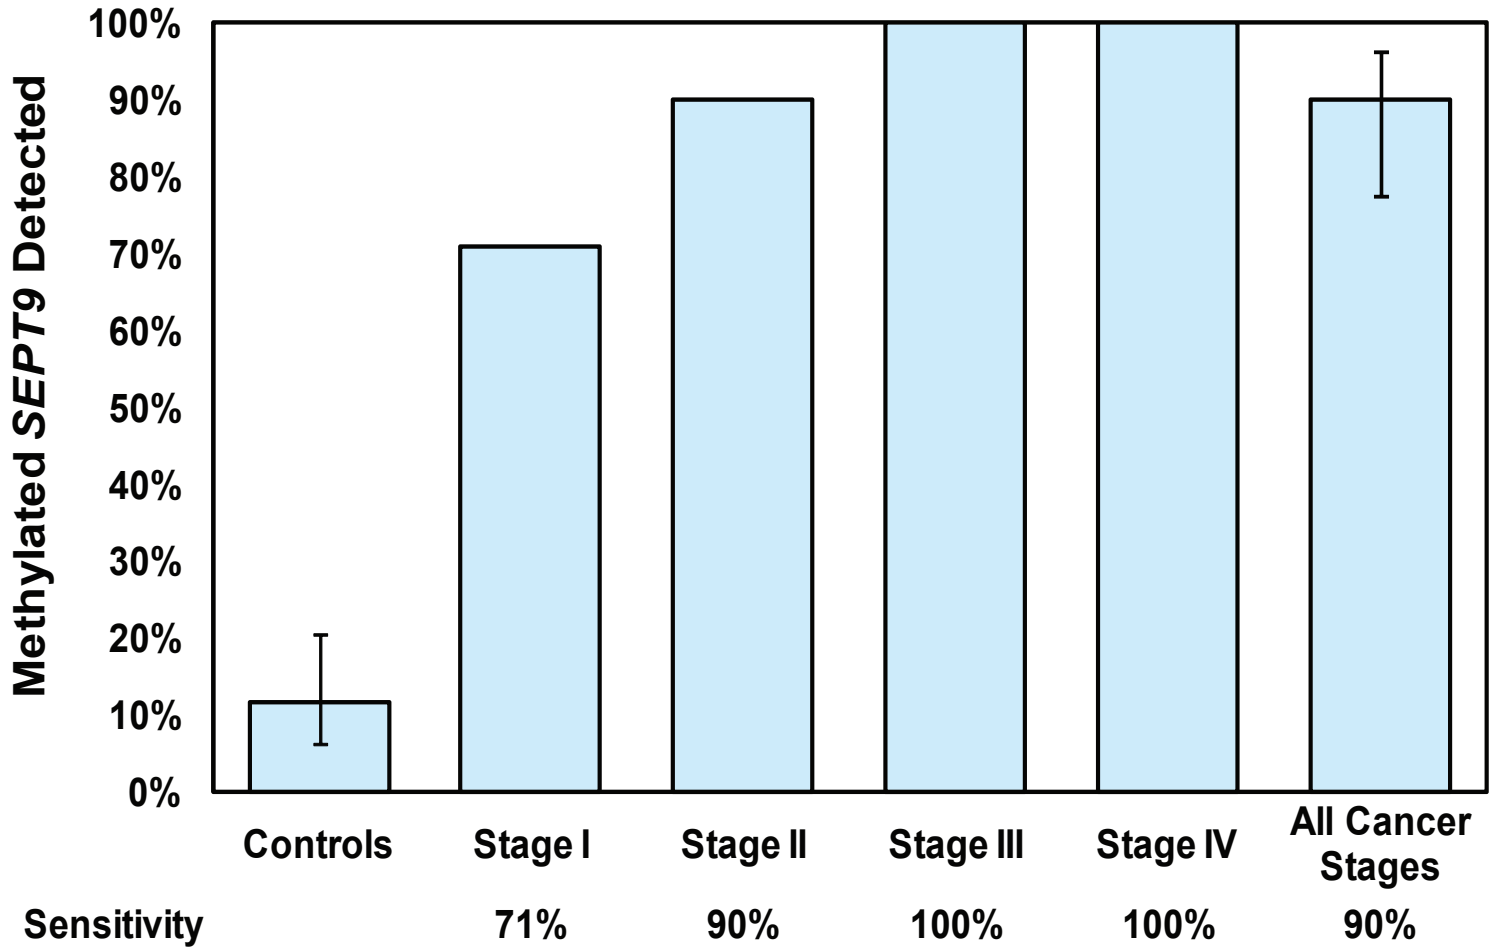

Supplement: MOESM5 [file 9599776]
